# Supplementary material
Source: PubMed Central journal article supplement (PMC3754607)
Supplement: JB.00071-13_zjb999092757so1.pdf [file JB.00071-13_zjb999092757so1.pdf]

## Supplemental Material

Table S1: Bacterial strains used in this study.

| Strains               | Phenotype or Description                    | References |
|-----------------------|---------------------------------------------|------------|
| <i>C. burnetii</i>    |                                             |            |
| RSA439                | Phase II, Clone 4                           | [57]       |
| RSA439 MK1            | CBU0012::Tn, Cm <sup>r</sup>                | This study |
| RSA439 MK2            | CBU0041::Tn, Cm <sup>r</sup>                | This study |
| RSA439 MK3            | CBU0344::Tn, Cm <sup>r</sup>                | This study |
| RSA439 MK4            | CBU0372::Tn, Cm <sup>r</sup>                | This study |
| RSA439 MK5            | CBU0388::Tn, Cm <sup>r</sup>                | This study |
| RSA439 MK6            | CBU0425::Tn, Cm <sup>r</sup>                | This study |
| RSA439 MK8            | CBU0937::Tn, Cm <sup>r</sup>                | This study |
| RSA439 MK9            | CBU1198::Tn, Cm <sup>r</sup>                | This study |
| RSA439 MK10           | CBU1457::Tn, Cm <sup>r</sup>                | This study |
| RSA439 MK11           | CBU1556::Tn, Cm <sup>r</sup>                | This study |
| RSA439 MK12           | CBU1569::Tn, Cm <sup>r</sup>                | This study |
| RSA439 MK13           | CBU1636::Tn, Cm <sup>r</sup>                | This study |
| RSA439 MK14           | CBU1639::Tn, Cm <sup>r</sup>                | This study |
| RSA439 MK15           | CBU1665::Tn, Cm <sup>r</sup>                | This study |
| RSA439 MK16           | CBU2007::Tn, Cm <sup>r</sup>                | This study |
| RSA439 MK17           | CBU2013::Tn, Cm <sup>r</sup>                | This study |
| RSA439 MK18           | CBU2016::Tn, Cm <sup>r</sup>                | This study |
| RSA439 MK19           | CBU2052::Tn, Cm <sup>r</sup>                | This study |
| RSA439 MK20           | CBU2059::Tn, Cm <sup>r</sup>                | This study |
| RSA439 MK21           | <i>icmX</i> ::Tn, Cm <sup>r</sup>           | This study |
| <i>L. pneumophila</i> |                                             |            |
| Lp02                  | Philadelphia-1 <i>rpsL hsdR thyA</i> mutant | [14]       |
| Lp03                  | Lp02 $\Delta$ <i>dotA</i>                   | [14]       |

|                      |                                                                                                                   |            |
|----------------------|-------------------------------------------------------------------------------------------------------------------|------------|
| <i>E. coli</i>       |                                                                                                                   |            |
| DH5α                 | <i>F'(Φ80dΔ(lacZ)M15), recA1, endA1, gyrA96, thi1, hsdR17 (rk-mk+), supE44, relA1, deoR, Δ(lacZYA-argF), U169</i> | Stratagene |
| <i>S. cerevisiae</i> |                                                                                                                   |            |
| W303                 | <i>MATa ura3-1 leu2-3,112 his3-11,15 trp1-1 ade2-1 cad-100 rad5-535</i>                                           | [58]       |

Table S2: Plasmids used in this study.

| Plasmid  | Description                                                                             | References or Source                |
|----------|-----------------------------------------------------------------------------------------|-------------------------------------|
| pKM225   | pMW1650, <i>com1p</i> -TnA7, <i>groESp</i> -mCherry, <i>com1p</i> -cat, Cm <sup>R</sup> | Mertens et al. (Manuscript In Prep) |
| pKM244   | pJB908a, <i>groESp</i> -mCherry, <i>com1p</i> -cat, Cm <sup>R</sup> , Amp <sup>R</sup>  | Mertens et al. (Manuscript In Prep) |
| pCBTEM   | pXDC61m, <i>groESp</i> -mCherry, <i>com1p</i> -cat, Cm <sup>R</sup> ,                   | [18]                                |
| pCBTEM-1 | pCBTEM:: Cbu0069                                                                        | This study                          |
| pCBTEM-2 | pCBTEM:: Cbu0113                                                                        | This study                          |
| pCBTEM-3 | pCBTEM:: Cbu0344                                                                        | This study                          |
| pCBTEM-4 | pCBTEM:: Cbu0606                                                                        | This study                          |
| pCBTEM-5 | pCBTEM:: Cbu01576                                                                       | This study                          |
| pCC108   | pKM244, HSP10p-EGFP, <i>com1p</i> -Flag-TEM, Kan <sup>R</sup>                           | This study                          |
| pCC108-1 | pCC108::CBU0080                                                                         | This study                          |
| pCC108-2 | pCC108::CBU0113                                                                         | This study                          |
| pCC108-3 | pCC108::CBU0388                                                                         | This study                          |
| pCC108-4 | pCC108::CBU0885                                                                         | This study                          |
| pCC108-5 | pCC108::CBU1665                                                                         | This study                          |
| pCC108-6 | pCC108::CBU1685                                                                         | This study                          |
| pCC108-7 | pCC108::CBU1754                                                                         | This study                          |
| pEGFP-C1 | C-terminal fusion to EGFP, kan <sup>r</sup>                                             | Clontech                            |
| pEGFP35  | pEGFP-C1::CBU0012                                                                       | This Study                          |

|         |                   |            |
|---------|-------------------|------------|
| pEGFP36 | pEGFP-C1::CBU0069 | This study |
| pEGFP37 | pEGFP-C1::CBU0080 | This study |
| pEGFP38 | pEGFP-C1::CBU0113 | This study |
| pEGFP39 | pEGFP-C1::CBU0183 | This study |
| pEGFP40 | pEGFP-C1::CBU0201 | This study |
| pEGFP41 | pEGFP-C1::CBU0212 | This study |
| pEGFP42 | pEGFP-C1::CBU0270 | This study |
| pEGFP43 | pEGFP-C1::CBU0295 | This study |
| pEGFP44 | pEGFP-C1::CBU0344 | This study |
| pEGFP45 | pEGFP-C1::CBU0372 | This study |
| pEGFP46 | pEGFP-C1::CBU0375 | This study |
| pEGFP47 | pEGFP-C1::CBU0376 | This study |
| pEGFP48 | pEGFP-C1::CBU0393 | This study |
| pEGFP49 | pEGFP-C1::CBU0425 | This study |
| pEGFP50 | pEGFP-C1::CBU0469 | This study |
| pEGFP51 | pEGFP-C1::CBU0513 | This study |
| pEGFP52 | pEGFP-C1::CBU0590 | This study |
| pEGFP53 | pEGFP-C1::CBU0606 | This study |
| pEGFP54 | pEGFP-C1::CBU0637 | This study |
| pEGFP55 | pEGFP-C1::CBU0665 | This study |
| pEGFP55 | pEGFP-C1::CBU0773 | This study |
| pEGFP56 | pEGFP-C1::CBU0885 | This study |
| pEGFP57 | pEGFP-C1::CBU1079 | This study |
| pEGFP58 | pEGFP-C1::CBU1102 | This study |
| pEGFP59 | pEGFP-C1::CBU1110 | This study |
| pEGFP60 | pEGFP-C1::CBU1150 | This study |
| pEGFP62 | pEGFP-C1::CBU1198 | This study |
| pEGFP63 | pEGFP-C1::CBU1434 | This study |
| pEGFP64 | pEGFP-C1::CBU1525 | This study |

|         |                    |            |
|---------|--------------------|------------|
| pEGFP65 | pEGFP-C1::CBU1566  | This study |
| pEGFP66 | pEGFP-C1::CBU1576  | This study |
| pEGFP67 | pEGFP-C1::CBU1594  | This study |
| pEGFP68 | pEGFP-C1::CBU1607  | This study |
| pEGFP69 | pEGFP-C1::CBU1620  | This study |
| pEGFP71 | pEGFP-C1::CBU1639  | This study |
| pEGFP72 | pEGFP-C1::CBU1665  | This study |
| pEGFP73 | pEGFP-C1::CBU1677  | This study |
| pEGFP74 | pEGFP-C1::CBU1685  | This study |
| pEGFP75 | pEGFP-C1::CBU1754  | This study |
| pEGFP76 | pEGFP-C1::CBU1789  | This study |
| pEGFP77 | pEGFP-C1::CBU1790  | This study |
| pEGFP78 | pEGFP-C1::CBU2007  | This study |
| pEGFP79 | pEGFP-C1::CBU2013  | This study |
| pEGFP80 | pEGFP-C1::CBU2016  | This study |
| pEGFP81 | pEGFP-C1::CBU2028  | This study |
| pEGFP82 | pEGFP-C1::CBU2059  | This study |
| pEGFP83 | pEGFP-C1::CBU2064  | This study |
| pEGFP84 | pEGFP-C1::CBU2076  | This study |
| pEGFP85 | pEGFP-C1::CBUA0015 | This study |
| pEGFP86 | pEGFP-C1::CBUA0019 | This study |
| pEGFP87 | pEGFP-C1::CBUA0020 | This study |

pYES

|       |               |            |
|-------|---------------|------------|
| pYES1 | pYES::CBU0041 | This study |
| pYES2 | pYES::CBU0129 | This study |
| pYES3 | pYES::CBU0175 | This study |
| pYES4 | pYES::CBU0410 | This study |
| pYES5 | pYES::CBU0414 | This study |
| pYES6 | pYES::CBU0794 | This study |

|        |               |            |
|--------|---------------|------------|
| pYES7  | pYES::CBU0801 | This study |
| pYES8  | pYES::CBU0814 | This study |
| pYES9  | pYES::CBU0881 | This study |
| pYES10 | pYES::CBU0937 | This study |
| pYES11 | pYES::CBU1045 | This study |
| pYES12 | pYES::CBU1217 | This study |
| pYES13 | pYES::CBU1314 | This study |
| pYES14 | pYES::CBU1379 | This study |
| pYES15 | pYES::CBU1406 | This study |
| pYES16 | pYES::CBU1425 | This study |
| pYES17 | pYES::CBU1457 | This study |
| pYES18 | pYES::CBU1460 | This study |
| pYES19 | pYES::CBU1461 | This study |
| pYES20 | pYES::CBU1524 | This study |
| pYES21 | pYES::CBU1543 | This study |
| pYES22 | pYES::CBU1556 | This study |
| pYES23 | pYES::CBU1569 | This study |
| pYES24 | pYES::CBU1599 | This study |
| pYES25 | pYES::CBU1636 | This study |
| pYES26 | pYES::CBU1751 | This study |
| pYES27 | pYES::CBU1769 | This study |
| pYES28 | pYES::CBU1823 | This study |
| pYES29 | pYES::CBU1825 | This study |
| pYES30 | pYES::CBU2052 | This study |
| pYES31 | pYES::CBU0012 | This study |
| pYES32 | pYES::CBU0080 | This study |
| pYES33 | pYES::CBU0113 | This study |
| pYES34 | pYES::CBU0183 | This study |
| pYES35 | pYES::CBU0201 | This study |

|        |               |            |
|--------|---------------|------------|
| pYES36 | pYES::CBU0212 | This study |
| pYES37 | pYES::CBU0295 | This study |
| pYES38 | pYES::CBU0344 | This study |
| pYES39 | pYES::CBU0372 | This study |
| pYES40 | pYES::CBU0375 | This study |
| pYES41 | pYES::CBU0376 | This study |
| pYES42 | pYES::CBU0393 | This study |
| pYES43 | pYES::CBU0425 | This study |
| pYES44 | pYES::CBU0469 | This study |
| pYES45 | pYES::CBU0513 | This study |
| pYES47 | pYES::CBU0590 | This study |
| pYES48 | pYES::CBU0606 | This study |
| pYES49 | pYES::CBU0637 | This study |
| pYES50 | pYES::CBU0665 | This study |
| pYES51 | pYES::CBU0773 | This study |
| pYES52 | pYES::CBU0885 | This study |
| pYES53 | pYES::CBU1079 | This study |
| pYES54 | pYES::CBU1102 | This study |
| pYES55 | pYES::CBU1150 | This study |
| pYES57 | pYES::CBU1198 | This study |
| pYES58 | pYES::CBU1434 | This study |
| pYES59 | pYES::CBU1525 | This study |
| pYES60 | pYES::CBU1566 | This study |
| pYES61 | pYES::CBU1576 | This study |
| pYES62 | pYES::CBU1594 | This study |
| pYES63 | pYES::CBU1607 | This study |
| pYES64 | pYES::CBU1620 | This study |
| pYES66 | pYES::CBU1639 | This study |
| pYES67 | pYES::CBU1665 | This study |

|        |                |            |
|--------|----------------|------------|
| pYES68 | pYES::CBU1677  | This study |
| pYES69 | pYES::CBU1685  | This study |
| pYES70 | pYES::CBU1754  | This study |
| pYES71 | pYES::CBU1789  | This study |
| pYES72 | pYES::CBU2007  | This study |
| pYES73 | pYES::CBU2013  | This study |
| pYES74 | pYES::CBU2016  | This study |
| pYES75 | pYES::CBU2028  | This study |
| pYES76 | pYES::CBU2059  | This study |
| pYES77 | pYES::CBU2064  | This study |
| pYES78 | pYES::CBU2076  | This study |
| pYES79 | pYES::CBUA0014 | This study |
| pYES80 | pYES::CBUA0015 | This study |
| pYES81 | pYES::CBUA0019 | This study |
| pYES82 | pYES::CBUA0020 | This study |

Table S3: Predicted PmrA regulated ORFs

| ID      | 5' End | Putative PmrA binding site          | 3' End | Strand | Distance of predicted binding site to ATG |
|---------|--------|-------------------------------------|--------|--------|-------------------------------------------|
| CBU0013 | 13016  | TTAAGGTAACCTTAATATTTCTTGGTTAA--ACT  | 12985  | -      | 29                                        |
| CBU0021 | 18235  | TTAATATTTTCCTTAACCTAATGAAGTTATT--CT | 18266  | +      | 71                                        |
| CBU0023 | 22399  | TTAATTTTATCTTAAGATAAGGAAATCTTT--ACT | 22367  | -      | 48                                        |
| CBU0051 | 49435  | CTCATACTTCCTTAAGGTTTTTTGGAGAT--ACT  | 49404  | -      | 72                                        |
| CBU0069 | 63320  | CTAAGATTATCTTAATTTTAACTTGATAGC-A-T  | 63351  | +      | 31                                        |
| CBU0077 | 71460  | TTAAAATTAATAATTA--TCAATTAATATTGACCT | 71491  | +      | 82                                        |
| CBU0084 | 75607  | TTAATATTATCTTAAGGTTATTGGGTTATT-C-T  | 75638  | +      | 0                                         |
| CBU0119 | 111571 | TTAAGAAATCTTTAATCTCGCAGTGGTATG-C-T  | 111540 | -      | 79                                        |
| CBU0144 | 131010 | TTAAGTTTGTTTTAATATCGATGTGTCAA--GAT  | 131041 | +      | 38                                        |
| CBU0183 | 172128 | TTAAGAGTATTTTAAGTTTATGCAGATAT--AAT  | 172159 | +      | 104                                       |

|         |         |                                     |         |   |     |
|---------|---------|-------------------------------------|---------|---|-----|
| CBU0201 | 190143  | TTAATATTATTTTAA-ATCTTACCTTTAAAAAAT  | 190111  | - | 70  |
| CBU0213 | 197619  | TTAAGATTGAATTAATTTTTGGATATTAC--TTT  | 197588  | - | 28  |
| CBU0215 | 200426  | TTAACAGAAAATTAA--TTTTAGGGATTTCACCT  | 200395  | - | 136 |
| CBU0273 | 245187  | TTAATATTATTTTAAACCTTTCGTCCCTAAA-A-T | 245156  | - | 32  |
| CBU0326 | 293301  | TTAAGAAAATCTTAAATTTTATCGATGATT--CA  | 293270  | - | 52  |
| CBU0343 | 310482  | TTCATATTCACCTTAATCTTATTGTAGTAAC-T-T | 310513  | + | 88  |
| CBU0355 | 322015  | CTAAGATTCTCTTAATCTCATTACAGAATGA--T  | 322046  | + | 31  |
| CBU0361 | 327063  | TTAAGAAAACTTAAGGAAGAATAGAAAAGT--TT  | 327032  | - | 106 |
| CBU0388 | 348481  | TTAATATTCCTTAAGCTTTATTCGTTACA-C-T   | 348512  | + | 72  |
| CBU0393 | 357811  | TTAATAAAGGTTAATGTTTTAGAGGTATT-C-T   | 357780  | - | 47  |
| CBU0436 | 388876  | TTAATATTTAATTAAGTTTATTTGTTTAGA-C-T  | 388845  | - | 94  |
| CBU0505 | 445857  | TTAATATTCCTTAAGTTTAAAGCTTTATA-A-T   | 445826  | - | 44  |
| CBU0600 | 547351  | TTAACTTTACCTTAACAAAACCTGATTAT--ACT  | 547382  | + | 35  |
| CBU0619 | 565992  | TTAATCTTTTCTTAAGGTTTTTGGCTTATA-C-T  | 565961  | - | 141 |
| CBU0625 | 569123  | TTAAGAATTCCTTAATAAATGAATGATAAG-A-T  | 569154  | + | 127 |
| CBU0637 | 586648  | TTAATTTTTACTTAATTTTT-TAATCGACT-TCT  | 586617  | - | 123 |
| CBU0665 | 606974  | TTAATATTTTCTTAATACCGCGATGGTATT-C-T  | 607005  | + | 13  |
| CBU0690 | 636458  | TGAACATGATTTTAA-ATCTTATGGTGTTATGCT  | 636490  | + | 82  |
| CBU0790 | 737321  | TTAATAATTCCTAATTTCTCAGTGTTATC-C-T   | 737352  | + | 83  |
| CBU0860 | 816692  | TTAATAAATCATTAATATTGTTGTTGGATA-A-T  | 816723  | + | 46  |
| CBU0978 | 930285  | TTAAGCTTTTTTTAATAATAAAAATGTTAG--ACT | 930316  | + | 34  |
| CBU0992 | 940945  | TTAAGATTTTCCTAAGGGTTATGAAGTACT-A-T  | 940914  | - | 35  |
| CBU1017 | 962048  | TTAATTTTATTTTAA--TCTTATTGAT-TTTATT  | 962078  | + | 158 |
| CBU1033 | 975307  | TTAAGAGTTCTTTAAGGTTTCGCCCCTAC--ACT  | 975338  | + | 165 |
| CBU1049 | 992640  | TTCATATTTTCGTTAAGTTTGGAGTGCTAAT-A-T | 992609  | - | 31  |
| CBU1059 | 1005087 | TTTAGATTATTTTAAATTTAAAAAGTTTAG--AGG | 1005056 | - | 147 |
| CBU1098 | 1047078 | TTAATAAATTCTTAAGATTAAGCTGTTATT-C-T  | 1047047 | - | 39  |
| CBU1103 | 1051114 | TTAATATTCTCTTAAGGTTGATGAGGTAGA-T-T  | 1051083 | - | 30  |
| CBU1110 | 1056911 | TTAATGAAGCTTTAACAATAGAGCGATAT--ACT  | 1056880 | - | 23  |



|         |         |                                     |         |   |     |
|---------|---------|-------------------------------------|---------|---|-----|
| CBU1114 | 1059926 | TTCATACTTTTTTAAGCAAACGTTGATAT--CCT  | 1059895 | - | 37  |
| CBU1167 | 1110630 | TTAATATTCTCTTAATAGCTTCATCCAATAA--T  | 1110599 | - | 72  |
| CBU1178 | 1119864 | TTAAAATTTCTTTAATAAACTTCTACTAA--ACT  | 1119895 | + | 117 |
| CBU1198 | 1142178 | TTAAGGCTACGTTAAGTTGAAGGGAGTAA--GAT  | 1142209 | + | 44  |
| CBU1213 | 1157000 | TTAAGATTGATTTAATGTCTGGCGTTAG--AAT   | 1157031 | + | 36  |
| CBU1216 | 1161120 | TTAATTTTATTTTAATTTATTTTCGGATAC--ACT | 1161089 | - | 33  |
| CBU1226 | 1176853 | TTAATTTTGCTTTAA--ATGCAAGCATTTTTATT  | 1176822 | - | 41  |
| CBU1252 | 1204114 | TTAACGGTAATTTAAGGTTTCTTTTCTAAA-A-T  | 1204083 | - | 21  |
| CBU1253 | 1204021 | TTCAGGTTCACTTAAGTTTAAAAGGTTAA--TTT  | 1204052 | + | 235 |
| CBU1288 | 1242627 | TTAACTTTCCTCTAAGAAAAGACTGTTAT--AGT  | 1242596 | - | 44  |
| CBU1291 | 1245983 | TTAATGGAAACTTAAGCTTTCCTTCATTACA-A-T | 1246014 | + | 41  |
| CBU1368 | 1318196 | TTAATATTTTCTTAATCCAATTCAGTGTGC--A   | 1318165 | - | 94  |
| CBU1369 | 1318222 | TTAAGCGTAATTTAATATTATGCCCTTAT--AAT  | 1318253 | + | 17  |
| CBU1370 | 1320557 | TTAATTTTTTCATAATGTAGGAATTATAT--ACT  | 1320526 | - | 51  |
| CBU1387 | 1336989 | TTCATATAGCCTTAA--TATGGTTACTGTAAAAT  | 1337020 | + | 48  |
| CBU1409 | 1359599 | TTAAGGTTAACCTAAGCTTGAGTTGTTAGA-A-T  | 1359630 | + | 133 |
| CBU1420 | 1369171 | CTAATATTCCTTCAGTTTATATTGATAAC-A-T   | 1369202 | + | 17  |
| CBU1523 | 1471228 | TTAAGATTAATTTAC--TCTTGTTATTATTACA   | 1471259 | + | 88  |
| CBU1530 | 1481188 | TTAATATATTTTTAAGTTTCATACATTAAC-A-T  | 1481157 | - | 36  |
| CBU1535 | 1484881 | TTAAGATTTGTTAAGCAGGCTGCCCTAT--ACT   | 1484850 | - | 45  |
| CBU1564 | 1512170 | ATCAGATTCCGTTAATAATTCGGCAGTAT--ACT  | 1512139 | - | 43  |
| CBU1576 | 1522991 | TTCATATTTCTTTAATTTTTTCAGCGCTATC-A-T | 1523022 | + | 43  |
| CBU1611 | 1555499 | TTAATATTTTATTAAGTTTATCGATTTATA-G-T  | 1555468 | - | 48  |
| CBU1618 | 1557905 | TTAATATTAATAATTAATTAAGAAAT-AGA-A-T  | 1557935 | + | 101 |
| CBU1624 | 1563565 | TTAATATTTTCCTTAAGGTAAGGAAGGTATA--GT | 1563534 | - | 41  |
| CBU1639 | 1579897 | TTAATTTTGCTTTAAGTTTAACGCGCTAAC-A-T  | 1579866 | - | 58  |
| CBU1649 | 1589543 | TTAATACTGTCTTAAGGAAGTGGTGCTAGC-A-T  | 1589512 | - | 42  |
| CBU1650 | 1589620 | TTAATATTTTCGTTAAGGTTAGTGGGCTATT-C-T | 1589651 | + | 48  |
| CBU1685 | 1616231 | TTAATTTTCTTTAA--TTAATTTTAATAATATT   | 1616262 | + | 18  |

|          |         |                                      |         |   |     |
|----------|---------|--------------------------------------|---------|---|-----|
| CBU1701  | 1634450 | CTAATATTCCTTAACTTCCTTCTGGTAGG-A-T    | 1634481 | + | 33  |
| CBU1757  | 1688680 | TCAAGACTTAATTAA--TTTATTTTATTTATATG   | 1688649 | - | 39  |
| CBU1758  | 1689382 | TTAACTTTTTCTTAACTTAAAAGTGGTAA--ACT   | 1689351 | - | 23  |
| CBU1775  | 1705606 | CTAAGGTTAGTTTAATCTTGCTAAGGTAA--TAT   | 1705637 | + | 65  |
| CBU1780  | 1708193 | TTCATTTTTCTTTAAGTTTTGATTGATAAC-A-T   | 1708224 | + | 129 |
| CBU1794  | 1725403 | TTAAGGTTTTCTTAATAAAGGCTGTTTAT--ACT   | 1725434 | + | 26  |
| CBU1818  | 1748733 | TTTATTTACATTTAA--TTAAAATCATTATTAT    | 1748764 | + | 51  |
| CBU1822  | 1753234 | TTAGGATTAATAATTAACATGCAGGTGTTAA--GAT | 1753203 | - | 88  |
| CBU1863  | 1793470 | TTAATATTTTTTTAATATTTGGATTTTAAG-A-T   | 1793439 | - | 69  |
| CBU2013  | 1920851 | TTAATAATTTGTTAATATCGGTTTGGTAAT-A-T   | 1920820 | - | 20  |
| CBU2051  | 1957518 | TTCATATATTTTTAAGCATGGCTTGGTAC--ACT   | 1957487 | - | 36  |
| CBUA0007 | 4919    | TTAATTCTTCTTTAATAATACTGATAT—CCT      | 4888    | - | 34  |

Table S4: *C. burnetii* T4SS candidates possessing an E block motif

| ID      | E position                       |
|---------|----------------------------------|
| CBU0012 | E_Position = [16,19,21]          |
| CBU0050 | E_Position = [3,6,9,28]          |
| CBU0061 | E_Position = [1,15,16,17,19]     |
| CBU0067 | E_Position = [18,22,26,28]       |
| CBU0080 | E_Position = [0,1,7,18,19,20]    |
| CBU0092 | E_Position = [5,20,21]           |
| CBU0113 | E_Position = [11,18,19,20,21]    |
| CBU0115 | E_Position = [3,7,12,13,23]      |
| CBU0122 | E_Position = [6,8,9,10,11,18,22] |
| CBU0134 | E_Position = [14,16,25]          |
| CBU0150 | E_Position = [11,18,19]          |
| CBU0211 | E_Position = [5,8,10]            |
| CBU0212 | E_Position = [3,8,21,22,23]      |
| CBU0270 | E_Position = [9,13,15,26]        |

|         |                                 |
|---------|---------------------------------|
| CBU0295 | E_Position = [9,10,13,15,19]    |
| CBU0328 | E_Position = [1,15,18]          |
| CBU0339 | E_Position = [4,14,18,19]       |
| CBU0340 | E_Position = [3,8,15,24,25]     |
| CBU0344 | E_Position = [0,1,18,20]        |
| CBU0360 | E_Position = [6,9,11,15,19,23]  |
| CBU0372 | E_Position = [0,7,8,11,20,24]   |
| CBU0375 | E_Position = [6,8,27]           |
| CBU0376 | E_Position = [12,16,18,20,27]   |
| CBU0377 | E_Position = [3,13,16,20,21]    |
| CBU0425 | E_Position = [13,14,17]         |
| CBU0469 | E_Position = [2,5,10,26]        |
| CBU0470 | E_Position = [4,12,13,26]       |
| CBU0498 | E_Position = [2,13,16]          |
| CBU0507 | E_Position = [0,8,15,24,25]     |
| CBU0510 | E_Position = [5,12,16,17,24,25] |
| CBU0513 | E_Position = [4,6,22,24]        |
| CBU0562 | E_Position = [1,3,4,7]          |
| CBU0590 | E_Position = [16,22,25]         |
| CBU0606 | E_Position = [1,10,11,13]       |
| CBU0651 | E_Position = [3,14,16,22,27]    |
| CBU0654 | E_Position = [0,13,14]          |
| CBU0656 | E_Position = [10,23,27,28]      |
| CBU0658 | E_Position = [4,5,6,9,12]       |
| CBU0698 | E_Position = [0,1,6,15]         |
| CBU0699 | E_Position = [0,2,9]            |
| CBU0705 | E_Position = [7,11,22,24]       |
| CBU0706 | E_Position = [3,13,14,15]       |
| CBU0710 | E_Position = [1,4,5]            |

|         |                                       |
|---------|---------------------------------------|
| CBU0719 | E_Position = [2,17,18]                |
| CBU0756 | E_Position = [12,26,28]               |
| CBU0773 | E_Position = [11,16,17,24]            |
| CBU0879 | E_Position = [6,8,9,12,15,18,20]      |
| CBU0885 | E_Position = [10,12,14,16,18,20,21]   |
| CBU0891 | E_Position = [11,15,16,20,23]         |
| CBU0910 | E_Position = [7,9,18,19]              |
| CBU0941 | E_Position = [6,8,19,27]              |
| CBU0957 | E_Position = [0,1,10]                 |
| CBU0970 | E_Position = [11,13,16]               |
| CBU0972 | E_Position = [4,7,26]                 |
| CBU0985 | E_Position = [3,4,6,14,17,25]         |
| CBU1044 | E_Position = [3,4,13,20,24]           |
| CBU1065 | E_Position = [2,3,8]                  |
| CBU1069 | E_Position = [12,15,27,28]            |
| CBU1079 | E_Position = [14,18,19,25]            |
| CBU1088 | E_Position = [7,8,11]                 |
| CBU1102 | E_Position = [9,10,11,15,17]          |
| CBU1107 | E_Position = [7,11,15,17,20]          |
| CBU1108 | E_Position = [6,10,14,15,16,18,20,21] |
| CBU1124 | E_Position = [13,16,23,26]            |
| CBU1150 | E_Position = [11,12,24,28]            |
| CBU1164 | E_Position = [3,4,5,21]               |
| CBU1209 | E_Position = [8,11,12,13,14,19]       |
| CBU1215 | E_Position = [14,15,25,27]            |
| CBU1219 | E_Position = [0,3,10,17]              |
| CBU1224 | E_Position = [2,5,27]                 |
| CBU1234 | E_Position = [3,8,10,25]              |
| CBU1295 | E_Position = [0,10,11,16]             |

|         |                                   |
|---------|-----------------------------------|
| CBU1328 | E_Position = [2,3,19]             |
| CBU1354 | E_Position = [2,4,6]              |
| CBU1367 | E_Position = [9,12,28]            |
| CBU1377 | E_Position = [10,11,17]           |
| CBU1434 | E_Position = [0,17,19,28]         |
| CBU1463 | E_Position = [2,4,6,19]           |
| CBU1479 | E_Position = [3,5,18]             |
| CBU1496 | E_Position = [5,6,19,21]          |
| CBU1525 | E_Position = [4,5,13,15,22,23]    |
| CBU1533 | E_Position = [1,5,19,22]          |
| CBU1546 | E_Position = [6,8,20,25]          |
| CBU1566 | E_Position = [0,7,10,26,27]       |
| CBU1603 | E_Position = [12,24,25]           |
| CBU1607 | E_Position = [11,15,17,20,23]     |
| CBU1611 | E_Position = [0,12,24,25,27]      |
| CBU1616 | E_Position = [7,10,12,22]         |
| CBU1620 | E_Position = [4,9,11,12,14,16,18] |
| CBU1659 | E_Position = [7,20,21]            |
| CBU1660 | E_Position = [3,9,10,13,16,23,28] |
| CBU1662 | E_Position = [5,7,16,26]          |
| CBU1665 | E_Position = [21,22,26]           |
| CBU1667 | E_Position = [6,7,17]             |
| CBU1673 | E_Position = [5,8,9,22]           |
| CBU1677 | E_Position = [6,10,12,15,19,22]   |
| CBU1680 | E_Position = [11,20,21]           |
| CBU1686 | E_Position = [11,15,21,22]        |
| CBU1705 | E_Position = [3,7,14,16,25,28]    |
| CBU1733 | E_Position = [6,8,9,28]           |
| CBU1754 | E_Position = [2,9,15,17]          |

|          |                                   |
|----------|-----------------------------------|
| CBU1776  | E_Position = [2,4,11,12,14,15,18] |
| CBU1789  | E_Position = [1,3,24]             |
| CBU1790  | E_Position = [9,12,13,14,15]      |
| CBU1883  | E_Position = [1,9,10,17,22]       |
| CBU1954  | E_Position = [7,25,28]            |
| CBU1999  | E_Position = [9,11,17]            |
| CBU2007  | E_Position = [7,9,11,19]          |
| CBU2010  | E_Position = [15,25,28]           |
| CBU2016  | E_Position = [2,7,10,16,19,21]    |
| CBU2023  | E_Position = [8,15,18,23,25]      |
| CBU2028  | E_Position = [4,5,6,10]           |
| CBU2033  | E_Position = [5,21,22]            |
| CBU2034  | E_Position = [4,11,12]            |
| CBU2057  | E_Position = [3,8,15,24,25]       |
| CBU2059  | E_Position = [8,10,16,20]         |
| CBU2060  | E_Position = [0,2,6,16]           |
| CBU2064  | E_Position = [3,4,6,11,14,18,20]  |
| CBU2076  | E_Position = [6,7,15,25]          |
| CBUA0015 | E_Position = [8,12,14,16,17,18]   |
| CBUA0019 | E_Position = [1,9,11]             |
| CBUA0020 | E_Position = [10,19,22]           |

Table S5: *L. pneumophila* effectors used for the identification of homologs in *C. burnetii*

| Hit     | Query   | Hit description                                                                   | E value |
|---------|---------|-----------------------------------------------------------------------------------|---------|
| CBU0001 | lpg1924 | chromosomal replication initiator protein DnaA (dnaA) {Coxiella burnetii RSA 493} | 0.29    |
| CBU0026 | lpg1888 | ribose 5-phosphate isomerase (rpiA) [5.3.1.6] {Coxiella burnetii RSA 493}         | 0.24    |
| CBU0027 | lpg1106 | acyltransferase family protein {Coxiella burnetii RSA 493}                        | 0.17    |
| CBU0111 | lpg1106 | 2-amino-3-ketobutyrate coenzyme A ligase (kbl) [2.3.1.2...                        | 0.33    |
| CBU0147 | lpg1684 | preprotein translocase, SecA subunit (secA) {Coxiella burnetii RSA 493}           | 0.32    |

|         |         |                                                                                  |          |
|---------|---------|----------------------------------------------------------------------------------|----------|
| CBU0235 | lpg0021 | translation elongation factor G (fusA) {Coxiella burnetii RSA 493}               | 0.56     |
| CBU0530 | lpg1716 | TPR domain protein {Coxiella burnetii RSA 493}                                   | 0.16     |
| CBU0676 | lpg2539 | NAD dependent epimerase/dehydratase {Coxiella burnetii RSA 493}                  | 0.2      |
| CBU0682 | lpg0021 | conserved domain protein {Coxiella burnetii RSA 493}                             | 0.69     |
| CBU0693 | lpg1670 | dehydrogenase, E1 component, alpha subunit [1.2.4.1] {Coxiella burnetii RSA 493} | 0.52     |
| CBU0753 | lpg0260 | transporter, AcrB/AcrD/AcrF family {Coxiella burnetii RSA 493}                   | 0.49     |
| CBU0845 | lpg1692 | UDP-glucose/GDP-mannose dehydrogenase family {Coxiella ...}                      | 0.59     |
| CBU0902 | lpg1667 | hypothetical protein {Coxiella burnetii RSA 493}                                 | 0.3      |
| CBU1049 | lpg1959 | hypothetical protein {Coxiella burnetii RSA 493}                                 | 0.12     |
| CBU1108 | lpg0130 | hypothetical protein {Coxiella burnetii RSA 493}                                 | 0.26     |
| CBU1160 | lpg2148 | TPR domain protein {Coxiella burnetii RSA 493}                                   | 0.35     |
| CBU1282 | lpg2826 | carbamoyl-phosphate synthase, small subunit (carA) [6.3...                       | 0.15     |
| CBU1292 | lpg1083 | ankyrin repeat domain protein {Coxiella burnetii RSA 493}                        | 0.25     |
| CBU1341 | lpg2826 | GMP synthase (guaA) [6.3.5.2] {Coxiella burnetii RSA 493}                        | 0.5      |
| CBU1363 | lpg1171 | exodeoxyribonuclease I, putative {Coxiella burnetii RSA 493}                     | 0.15     |
| CBU1370 | lpg1639 | hypothetical protein {Coxiella burnetii RSA 493}                                 | 0.95     |
| CBU1387 | lpg2546 | hypothetical protein {Coxiella burnetii RSA 493}                                 | 0.054    |
| CBU1494 | lpg2555 | pyridoxal phosphate biosynthetic protein PdxJ (pdxJ) {Coxiella burnetii RSA 493} | 0.82     |
| CBU1535 | lpg0375 | hypothetical protein {Coxiella burnetii RSA 493}                                 | 0.88     |
| CBU1594 | lpg2359 | GatB/Yqey domain protein {Coxiella burnetii RSA 493}                             | 4.00E-30 |
| CBU1603 | lpg2912 | conserved hypothetical protein {Coxiella burnetii RSA 493}                       | 0.13     |
| CBU1852 | lpg2826 | hypothetical protein {Coxiella burnetii RSA 493}                                 | 0.072    |
| CBU2057 | lpg2546 | conserved hypothetical protein {Coxiella burnetii RSA 493}                       | 0.33     |

Table S6: Genome comparisons of T4SS substrates identified in this study. Brackets after each ORF indicate an alternative start (AS), an N-terminal (NT) and/or C-terminal (CT) truncation, or frame shift (FS) compared to corresponding NMI ORF. Numbers following abbreviation denote length of AS, amount truncated from N- or C- terminus, or site of frameshift.

| Gene Locus in NMI       | Alias in isolates                              |                               |                                        | Domain                                      |
|-------------------------|------------------------------------------------|-------------------------------|----------------------------------------|---------------------------------------------|
|                         | K                                              | G                             | Dugway                                 |                                             |
| Cbu0012                 | CbuK0201 (AS 242bp)                            | CbuG0281 (AS 242bp)           | CbuD0136 (AS 242bp)                    | P-loop                                      |
| Cbu0069                 | CbuK1982/CbuK1983 (NT 21bp, FS 137bp)          |                               | CbuD2035 (NT 29bp, FS 343bp)           | HRDC-like                                   |
| Cbu0080                 | CbuK1976 (AS 506bp,)                           | CbuG1937 (AS 506bp, CT 102bp) | CbuD2028                               | HLH DNA-binding domain                      |
| Cbu0113                 |                                                | CbuG1899                      | CbuD1994                               | PH-domain                                   |
| Cbu0183                 | CbuK0377 (CT 7bp)                              | CbuG1822 (CT 86bp)            | CbuD1910                               |                                             |
| Cbu0201                 | CbuK0392 (NT 77bp)                             | CbuG1805 (NT 77bp)            | CbuD1894 (NT 77bp)                     | Ankyrin repeat                              |
| Cbu0212                 | CbuK0401 (AS 1019bp)                           | CbuG1796 (AS 1019bp)          | Cbu1884 (AS 1019bp)                    |                                             |
| Cbu0270                 | CbuK0462                                       | CbuG1738                      | CbuD1824                               |                                             |
| Cbu0295                 | CbuK0492 (NT 272bp, CT 305bp)                  | CbuG1710 (NT 272bp)           | CbuD1787 (NT 17bp)                     | SEL1                                        |
| Cbu0344                 | CbuK0540 (AS 455bp)                            | CbuG1663 (NT 69bp)            | CbuD1734 (AS 455bp)                    | Coiled-coil<br>Fic,<br>transmembrane domain |
| Cbu0372                 | CbuK0563 (FS 621bp)                            | CbuG1637 (FS 700bp)           | CbuD1711                               |                                             |
| Cbu0375                 | CbuK0569 (NT 209bp)                            | CbuG1634 (NT 209bp)           | CbuD1704 (FS 468)                      |                                             |
| Cbu0376                 | CbuK0569 (AS 27bp)                             | CbuG1634 (AS 27bp)            | CbuD1704 (AS 515bp)                    |                                             |
| Cbu0388                 | CbuK1672/CbuK1673/CbuK1674 (NT 11bp, FS 975bp) | CbuG1619 (NT 11bp, FS 2044bp) | CbuG1679/CbuG1680 (NT 11bp, FS 1588bp) |                                             |
| Cbu0393                 | CbuK1668 (FS 287bp)                            | CbuG1615 (NT 142bp, FS 559bp) | CbuD1674 (FS 559bp)                    | RPT1 domain                                 |
| Cbu0425 ( <i>cirB</i> ) | CbuK1643 (AS 116bp, CT 539bp)                  | CbuG1587 (AS 116bp)           | CbuD1648 (AS 116bp, CT 59bp)           |                                             |
| Cbu0469                 | CbuK1391                                       | CbuG1544                      | CbuD1609                               |                                             |
| Cbu0513                 | CbuK1341 (NT 71bp, CT 54bp)                    | CbuG1498                      | CbuD1562                               |                                             |
| Cbu0590                 | CbuK1248 (NT 47bp)                             | CbuG2044 (NT 47bp)            | CbuD1474 (NT 47bp)                     |                                             |
| Cbu0606                 | CbuK1444 (AS 434bp, FS 163bp)                  | CbuG1397 (AS 434bp, FS 296bp) | CbuD0618 (AS 434bp)                    |                                             |
| Cbu0637                 | CbuK1619                                       | CbuG1367                      | CbuD0648                               |                                             |
| Cbu0665                 | CbuK1593 (NT 21bp)                             | CbuG1341 (NT 21bp, CT 85bp)   | CbuD0675 (AS 92bp)                     |                                             |
| Cbu0773                 | CbuK0643                                       | CbuG1228                      | CbuD0821                               |                                             |
| Cbu0885                 | CbuK0750                                       | CbuG1117                      | CbuD0949 (NT 86bp)                     | HAD-like                                    |
| Cbu1079                 | CbuK0945                                       | CbuG0924                      | CbuD1181                               |                                             |
| Cbu1102                 | CbuK0972 (AS 404bp, FS 1053)                   | CbuG0900 (CT 111bp)           | CbuD1204 (AS 404bp)                    |                                             |
| Cbu1110                 | CbuK0977 (FS 166bp)                            |                               | CbuD1210 (NT 53bp, FS 166bp)           |                                             |
| Cbu1150                 | CbuK1017 (AS 57bp)                             | CbuG0859 (AS 476bp)           | CbuD1247 (AS 476bp, CT 26bp)           | Transmembrane<br>helix hairpin              |
| Cbu1198                 | CbuK1062 (NT 140bp)                            | CbuG0811 (NT 140bp)           | CbuD1287                               |                                             |
| Cbu1434                 | CbuK0601                                       | CbuG0575                      | CbuD0561                               |                                             |
| Cbu1525                 | CbuK1752 (AS 152bp)                            | CbuG0485 (NT 459bp, FS 924bp) | CbuD0461 (AS 1900bp)                   | YebC-like                                   |
| Cbu1566                 | CbuK1793                                       | CbuG0446                      | CbuD0422                               |                                             |
| Cbu1576                 | CbuK1806 (NT 129bp)                            | CbuG0435/CbuG0436 (FS 902bp)  | CbuD0410                               | GatB/YqeY<br>motif                          |
| Cbu1594                 | CbuK1823                                       |                               | CbuD0395                               | Transmembrane<br>helix                      |
| Cbu1607                 | CbuK1834 (NT 242bp)                            | CbuG0407 (NT 242bp, CT 13bp)  | CbuD0383 (NT 242bp)                    |                                             |
| Cbu1620                 | CbuK1842 (FS 240bp)                            | CbuG0403 (AS 171bp)           | CbuD0378 (AS 296bp, FS 240bp)          |                                             |
| Cbu1639                 | CbuK1862                                       | CbuG0383 (FS 309bp)           | CbuD0358                               |                                             |
| Cbu1665                 | CbuK0343 (FS 897bp)                            |                               | CbuD0334                               |                                             |
| Cbu1677                 | CbuK0333                                       | CbuG0344                      | CbuD0334                               |                                             |
| Cbu1685                 | CbuK0326 (FS 1060bp)                           | CbuG0337                      | CbuD0324                               |                                             |
| Cbu1754                 | CbuK0252                                       | CbuG0136                      | CbuD0317 (NT 35bp, FS 427bp)           |                                             |
| Cbu1789                 | CbuK0083                                       | CbuG0170                      | CbuD0247                               |                                             |
| Cbu1790                 | CbuK0084 (FS 924bp)                            | CbuG0171 (FS 1685bp)          | CbuD0015                               | SGL-like                                    |
| Cbu2007                 | CbuK2058                                       | CbuG2016                      | CbuD0016 (FS 1263bp)                   | PRR domain                                  |
| Cbu2013                 | CbuK2064 (NT 50bp)                             | CbuG2022 (NT 50bp)            | CbuD2108                               |                                             |
| Cbu2016                 | CbuK2067                                       | CbuG2025                      | CbuD2113 (NT 50bp)                     |                                             |
| Cbu2028                 | CbuK2080 (AS 68bp, FS 46bp)                    | CbuG2038 (AS 51bp, FS 361bp)  | CbuD2117                               |                                             |
| Cbu2059 ( <i>cirE</i> ) | CbuK2105 (AS 389bp, CT 615bp)                  | CbuG2063 (NT 182bp, FS 313bp) | CbuD2129 (AS 51bp)                     | WW domain-<br>like                          |
| Cbu2064                 | CbuK2107 (AS 1233bp)                           | CbuG2065 (NT 22bp, CT 112bp)  | CbuD2154 (AS 389bp)                    |                                             |
| Cbu2076                 | CbuK2121                                       | CbuG2077                      | CbuD2156 (NT 22bp)                     |                                             |
| CbuA0015                |                                                |                               | Cbu2172                                | Coiled coil                                 |
| CbuA0019                |                                                |                               |                                        |                                             |
| CbuA0020                |                                                | CbuG2038 (CT 447bp)           | CbuDA0049 (CT 101bp)                   |                                             |

A.



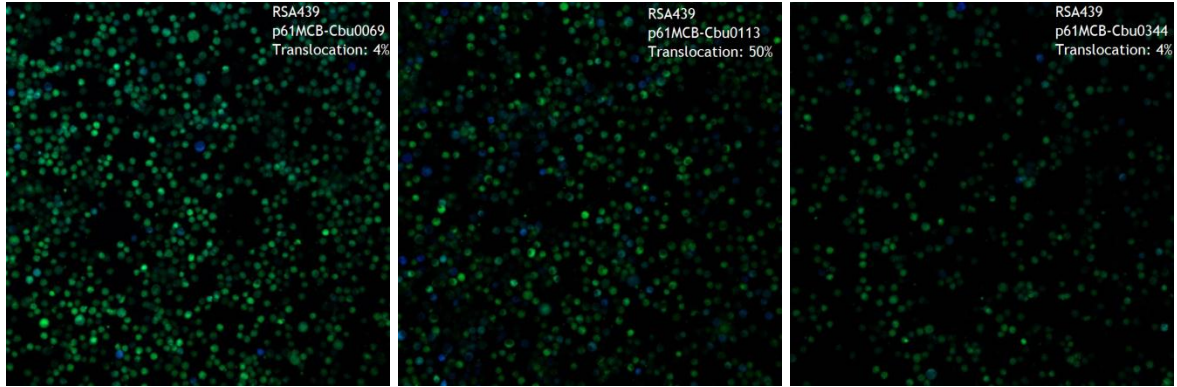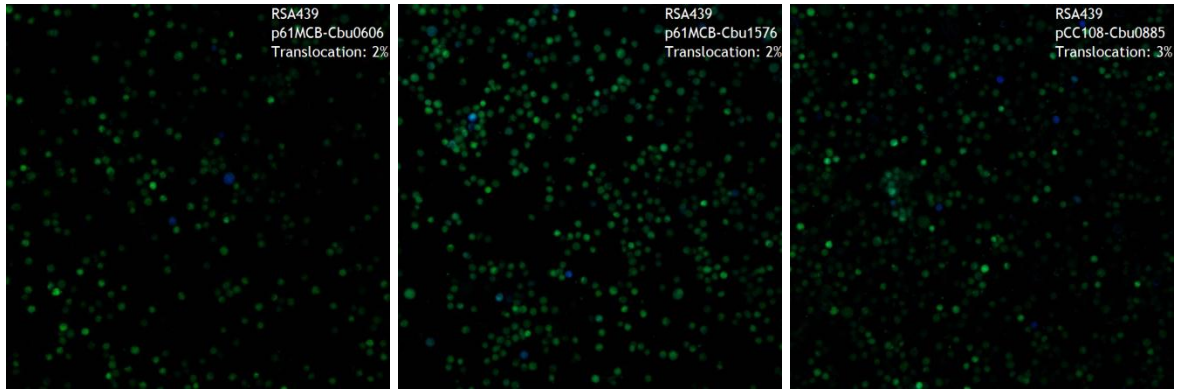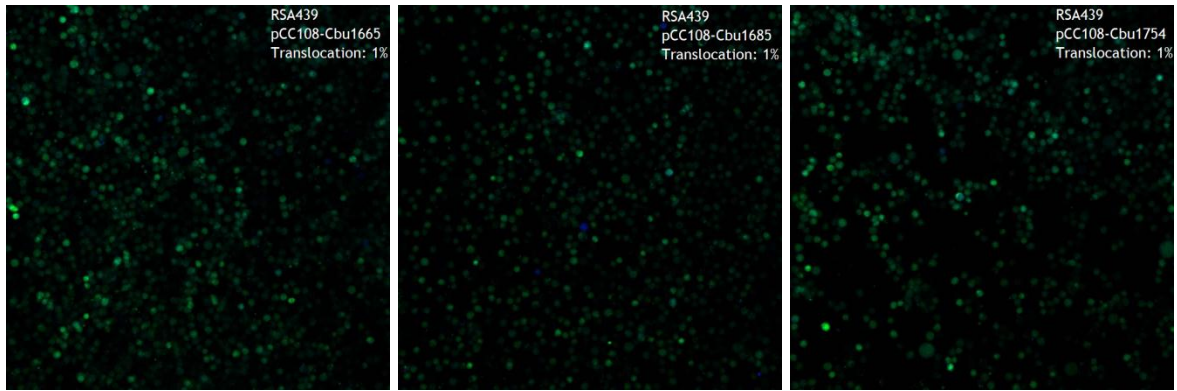

B.

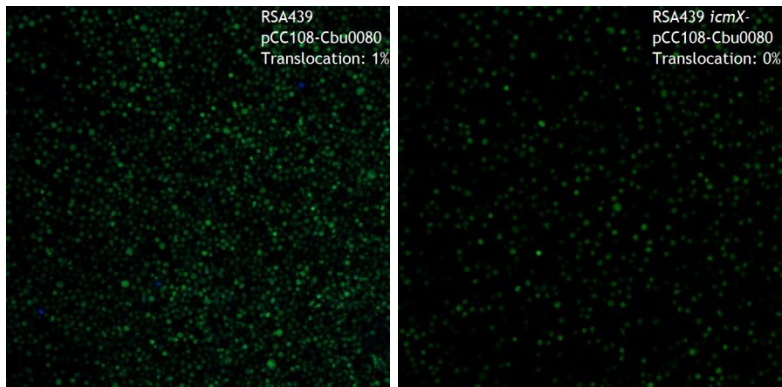

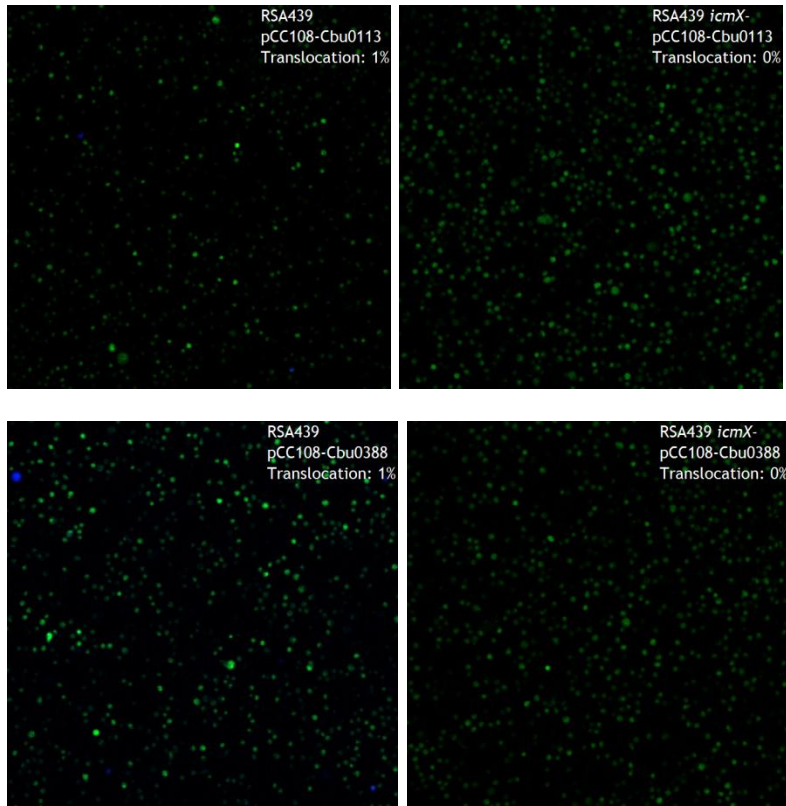

Figure S1: Newly identified secretion substrates are secreted by *C. burnetii*. THP-1 cells were infected for 48 h with *C. burnetii* expressing  $\beta$ -lactamase fusion constructs and subsequently loaded with CCF4/AM as described in materials and methods. (A) Confocal imaging of wild-type infected cells revealed the presence of blue cells (B) translocation of selected substrates was absent in cells infected with the *icmX*::Tn, indicating the identified substrates are translocated into host cells in a Dot/Icm-dependent manner.

### CBU0012

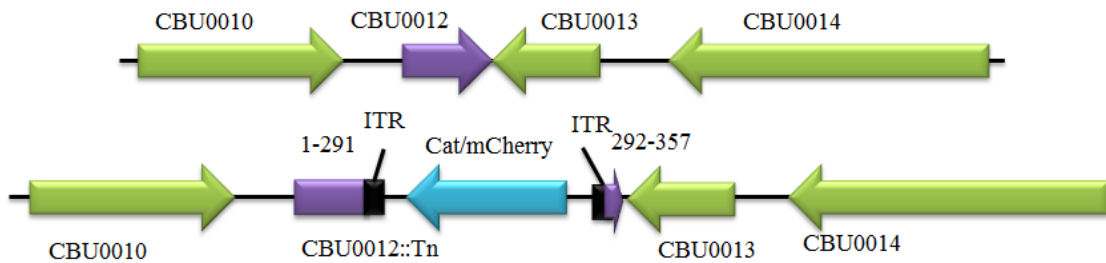

CBU0041 (*cirA*)

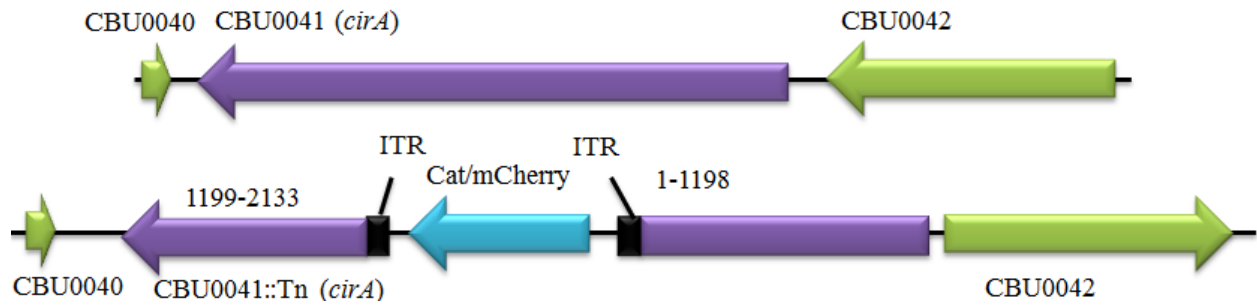

CBU0201

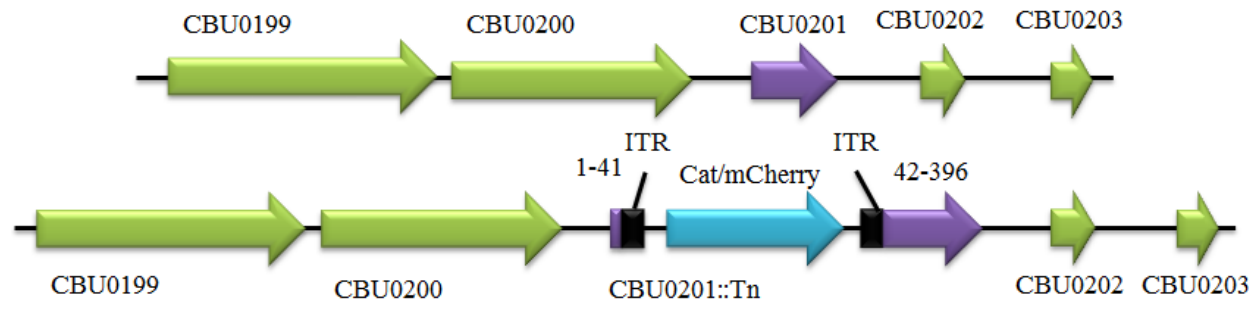

CBU0344

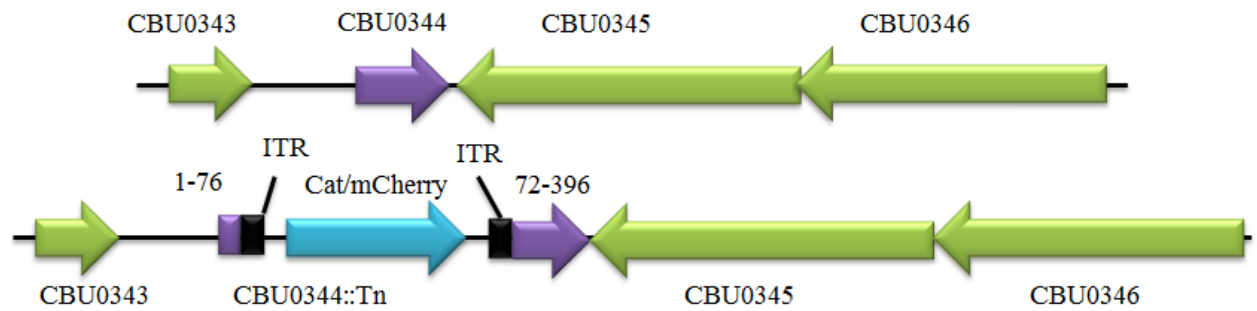

CBU0372

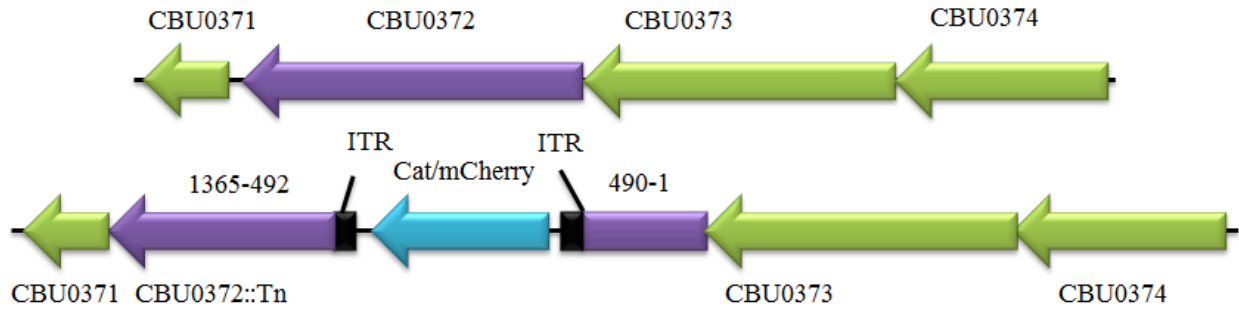

### CBU0388

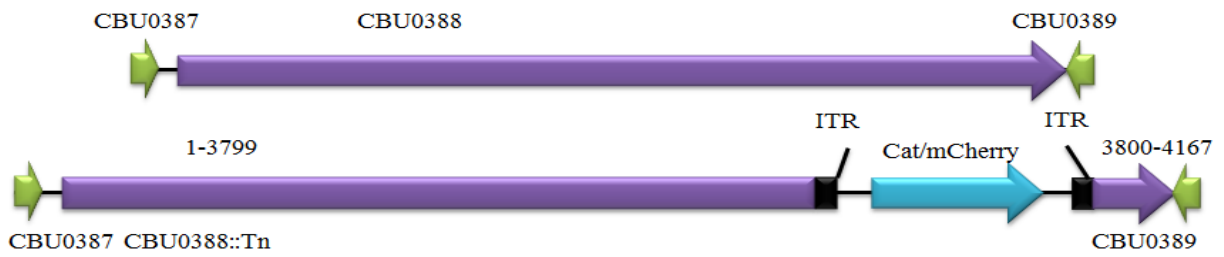

### CBU0425 (*cirB*)

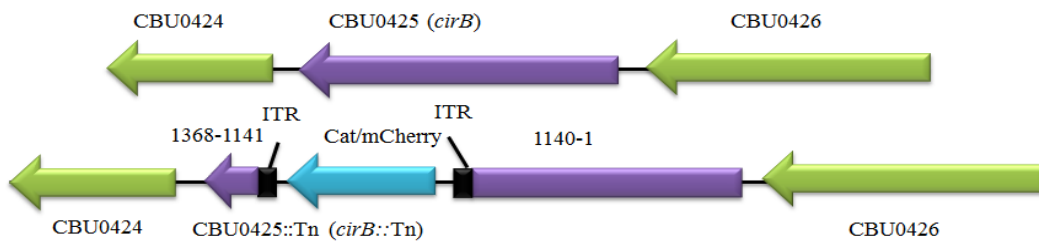

### CBU0937 (*cirC*)

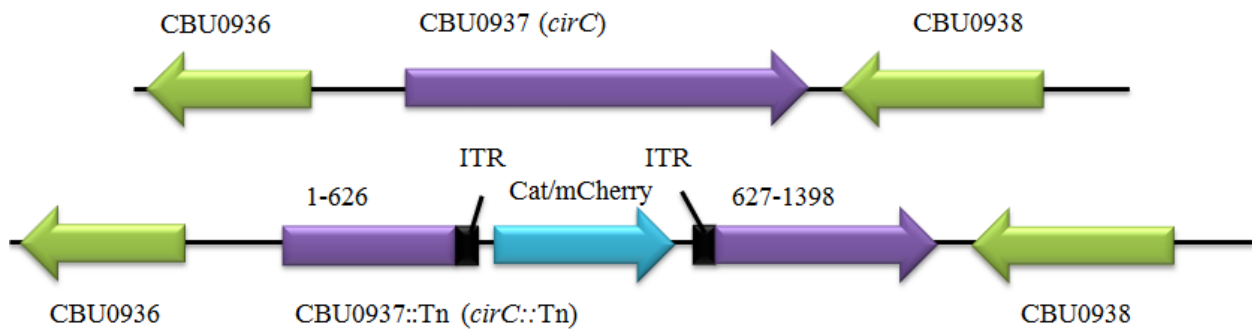

CBU1198

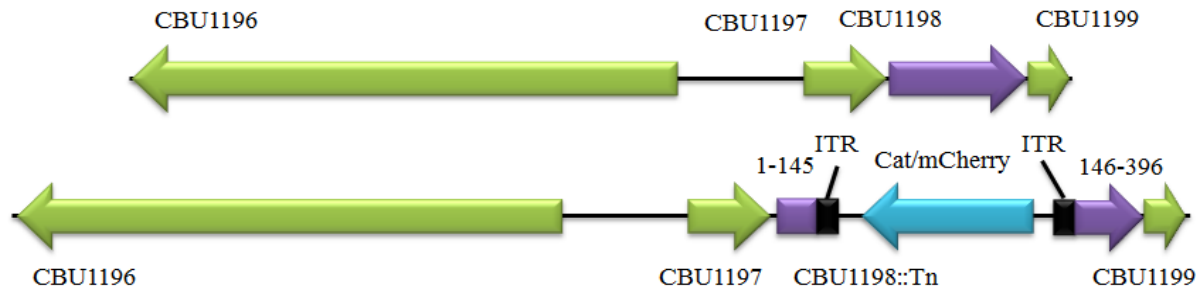

CBU1457

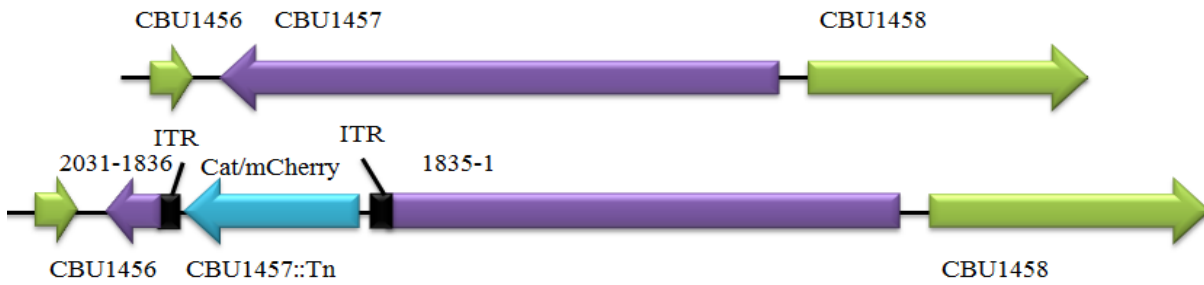

CBU1556

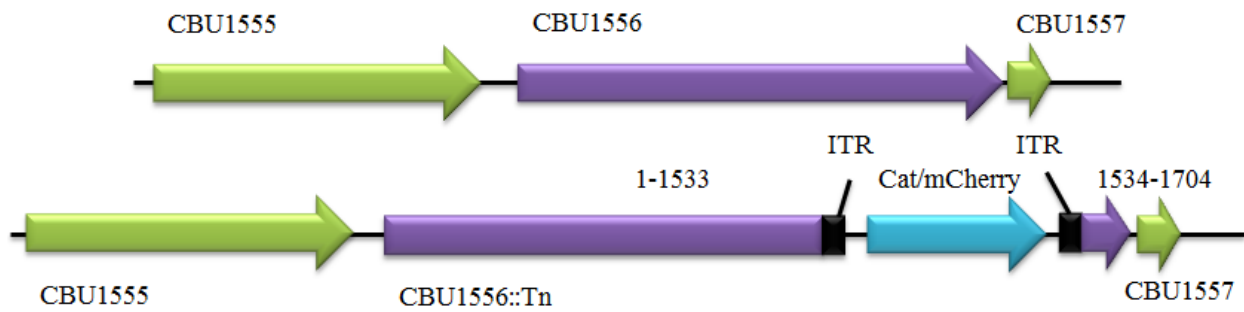

CBU1569

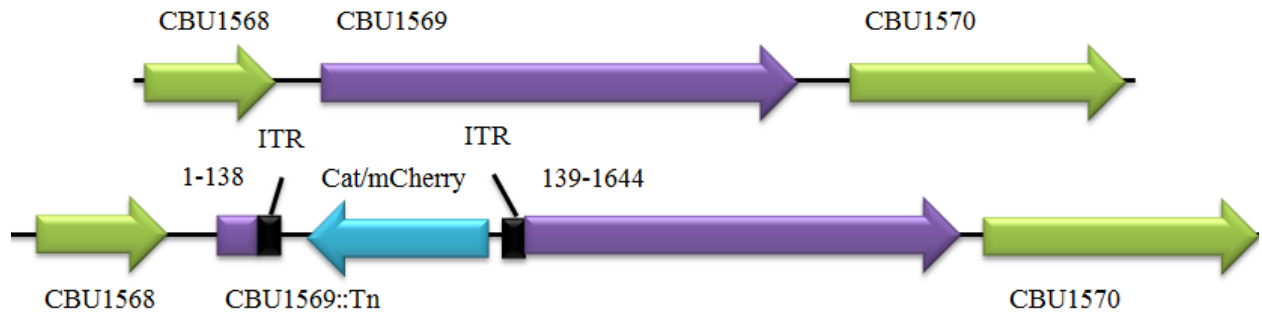

CBU1636

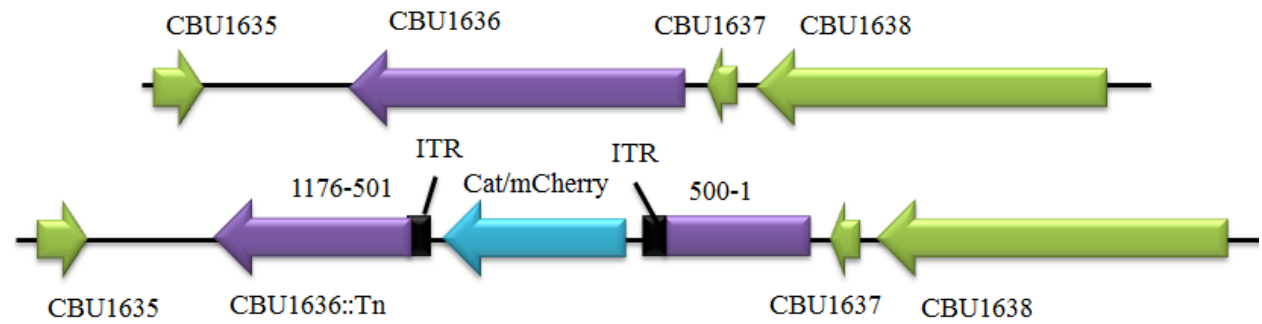

CBU1639

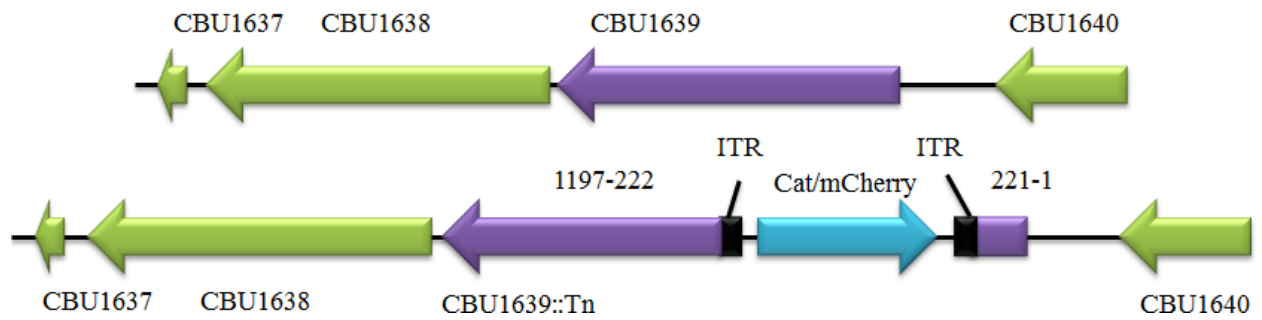

CBU1665

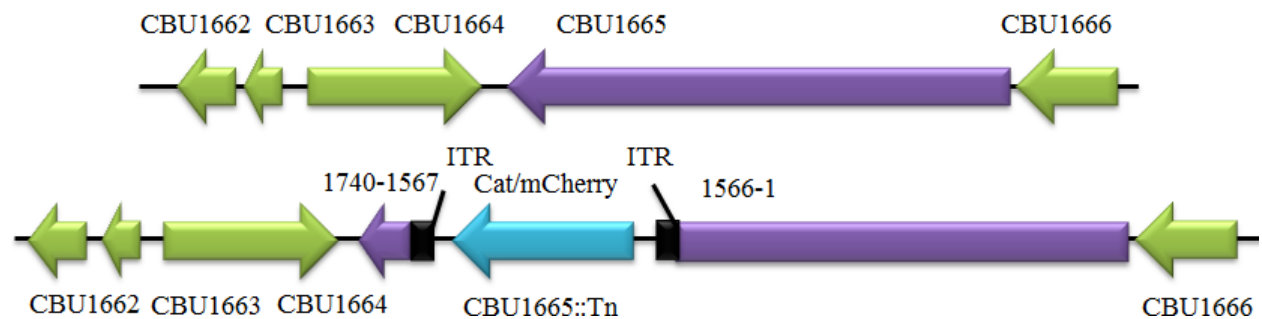

### CBU1639

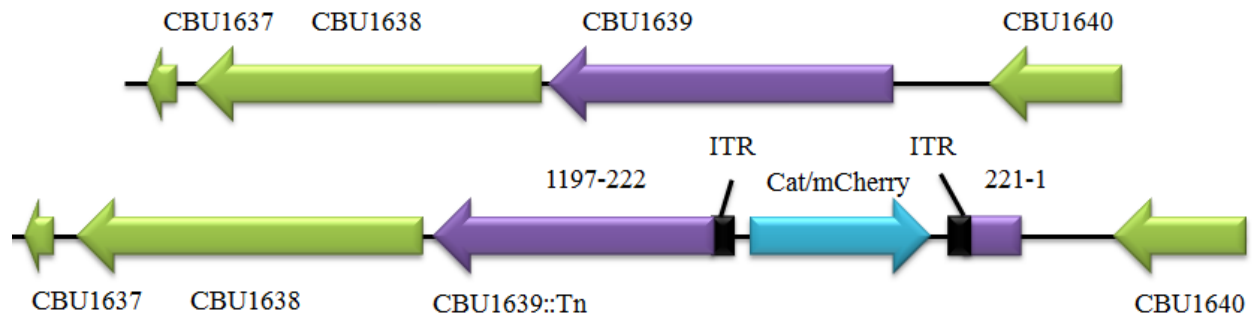

### CBU2007

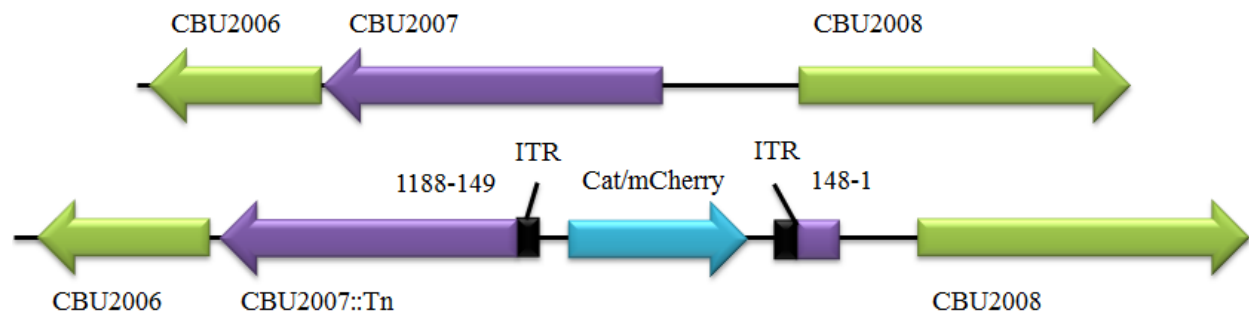

### CBU2013

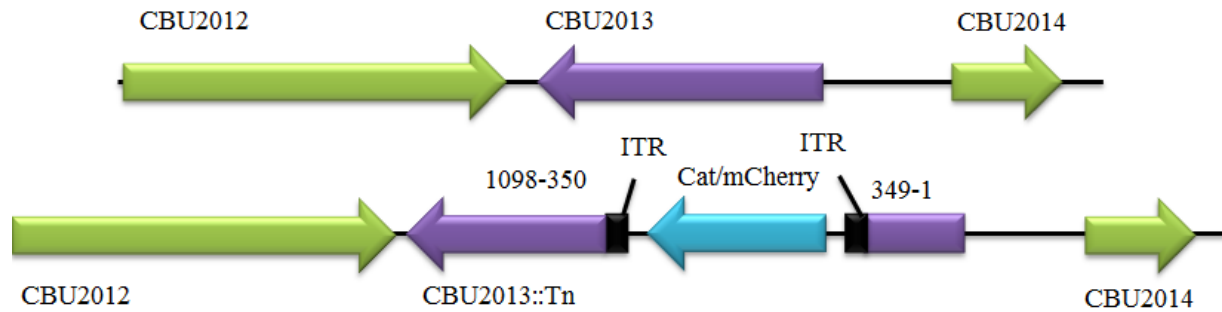

### CBU2016



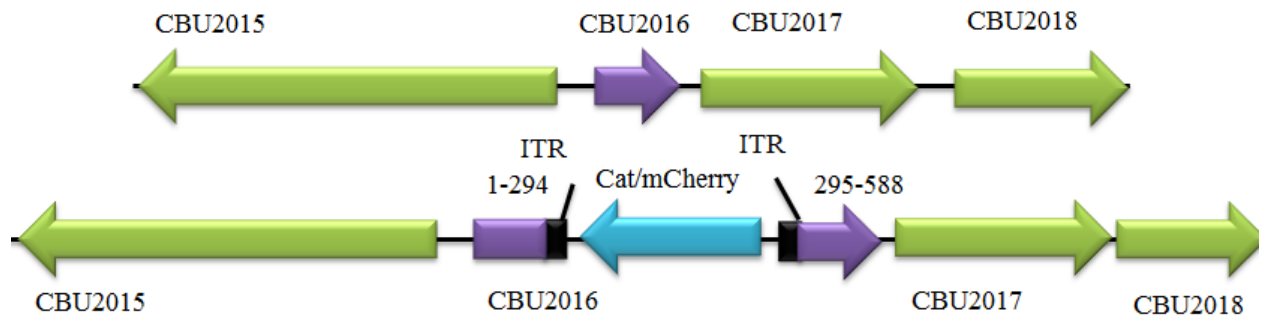

CBU2052 (*cirD*)

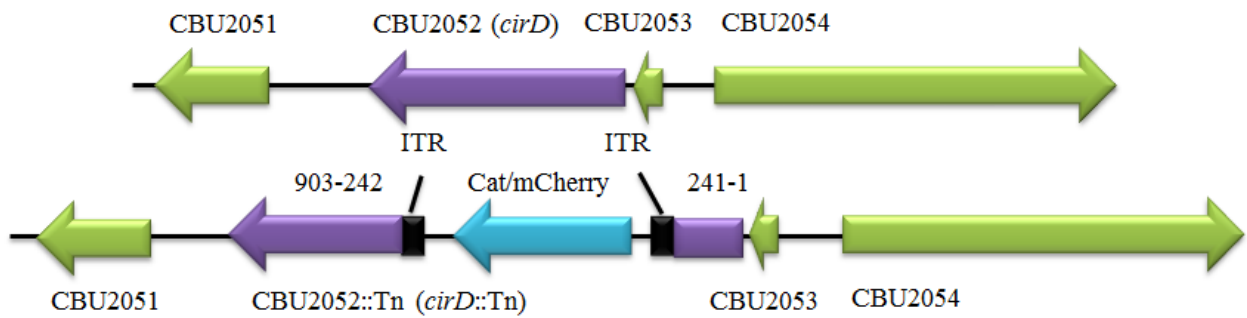

CBU2059 (*cirE*)

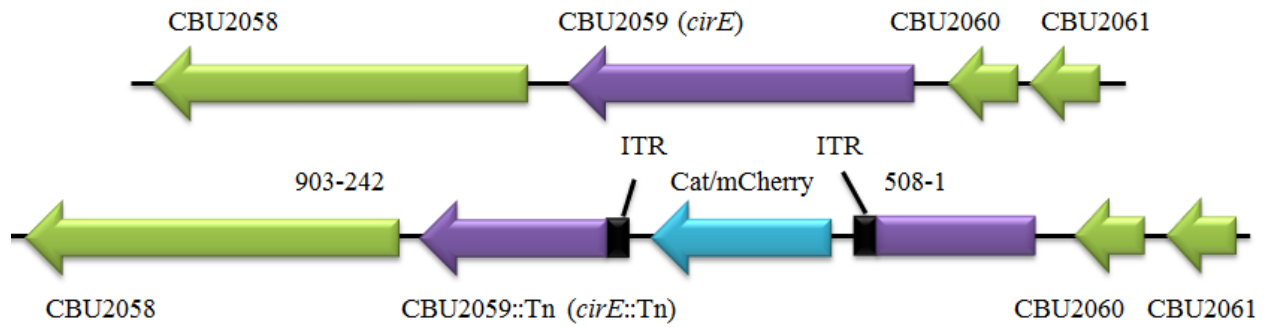

CBU1652 (*icmX*)



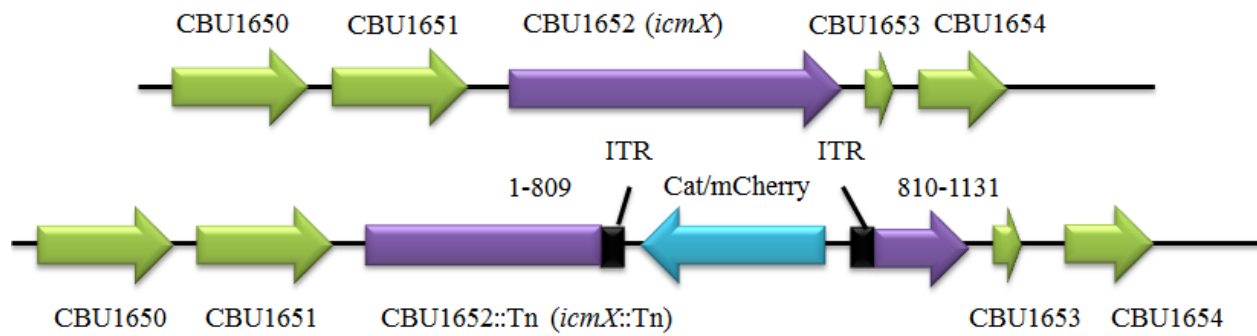

Figure S2: *Himar1* transposon insertion into *C. burnetii* T4SS substrate genes. To generate a large pool of *C. burnetii* Tn mutants, NMII was transformed with pKM225, and the resulting transformants were expanded and rescue cloned and three *E. coli* colonies were sequenced per transformation. The schematic shows the insertion of the *Himar1* transposon (blue) into the T4SS substrate genes (purple).

A

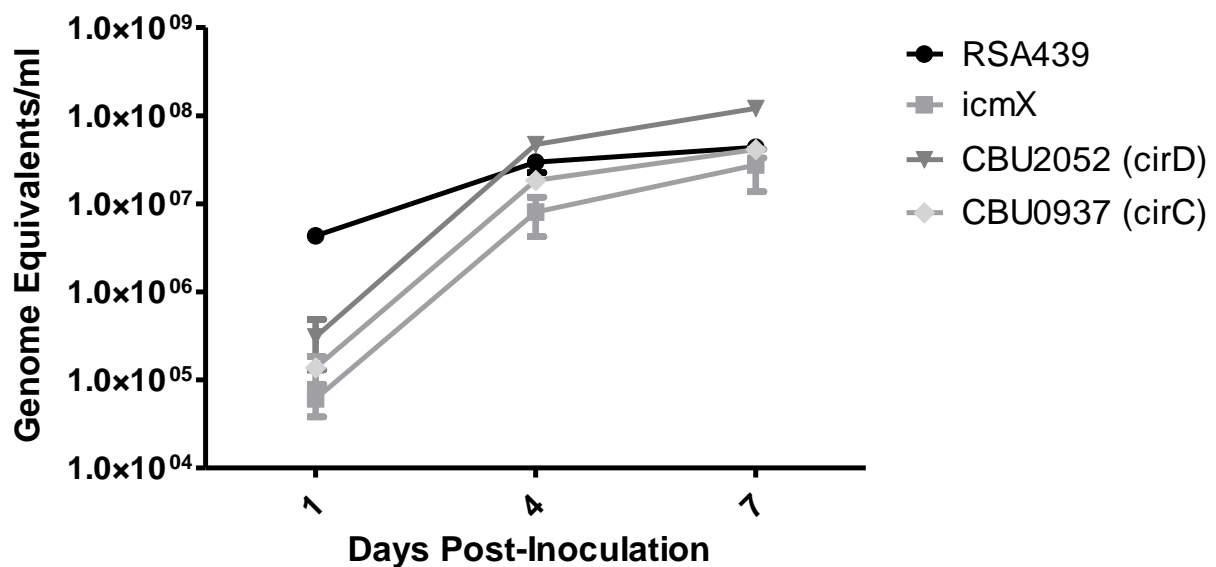

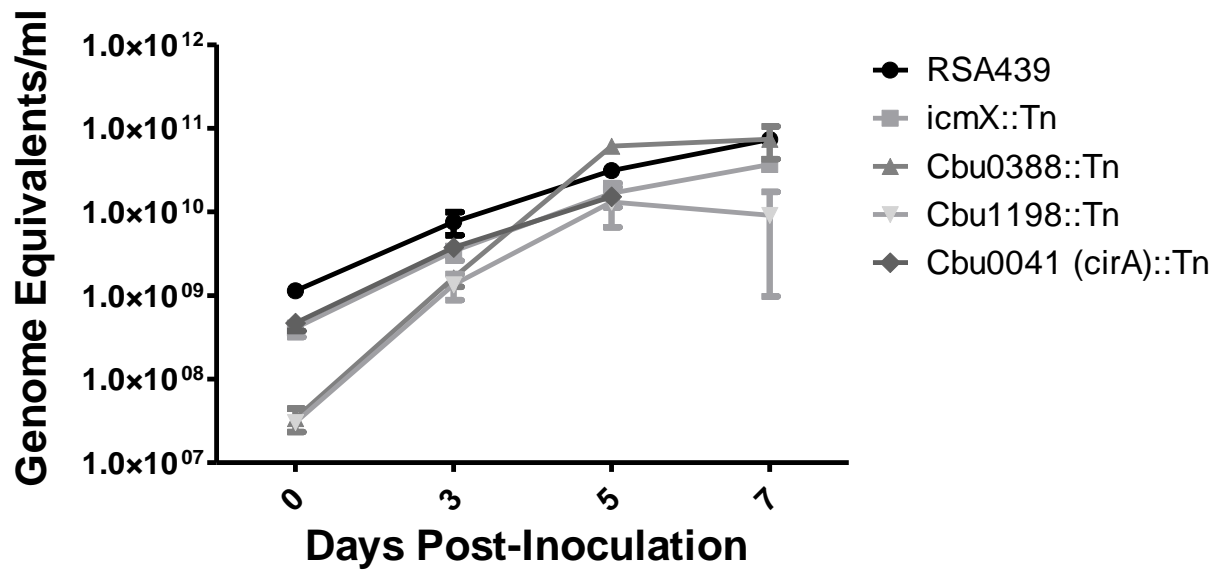

B

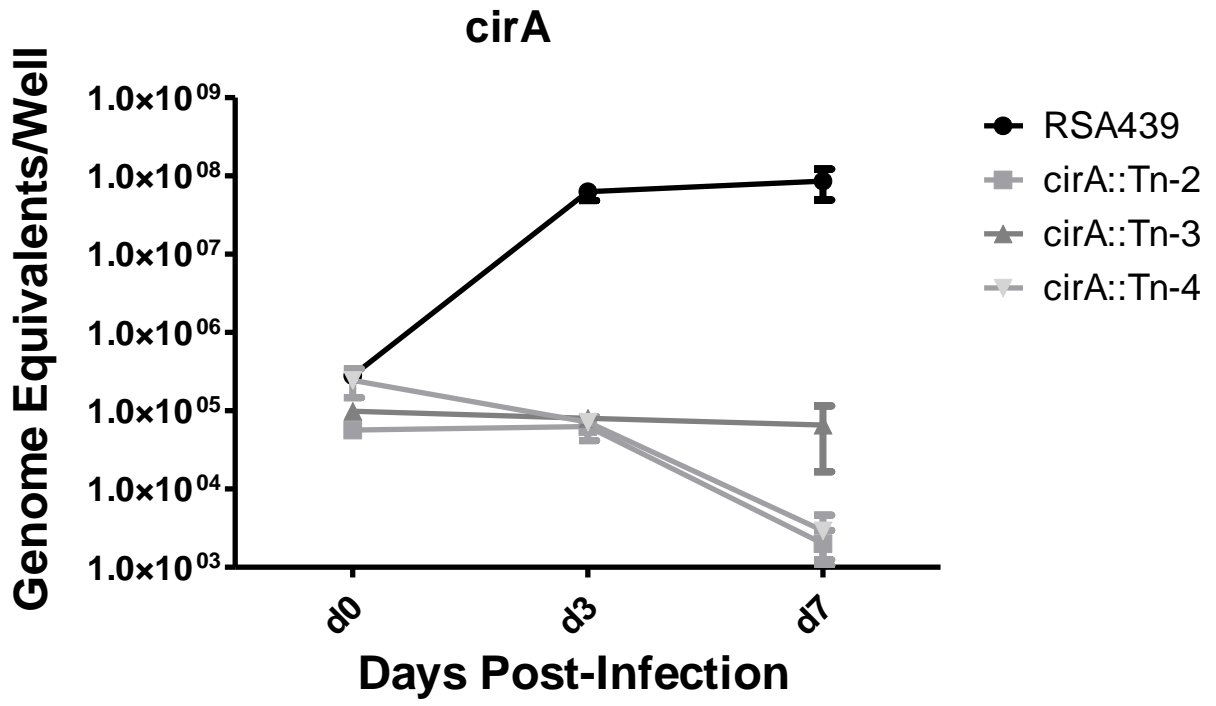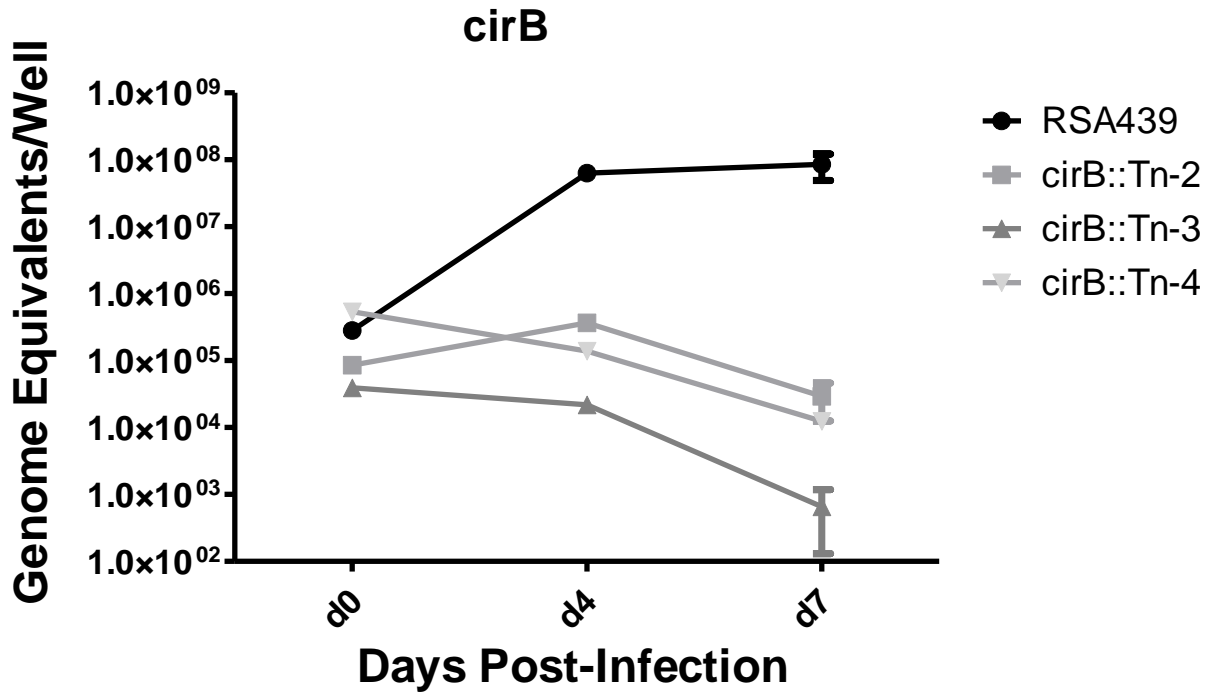

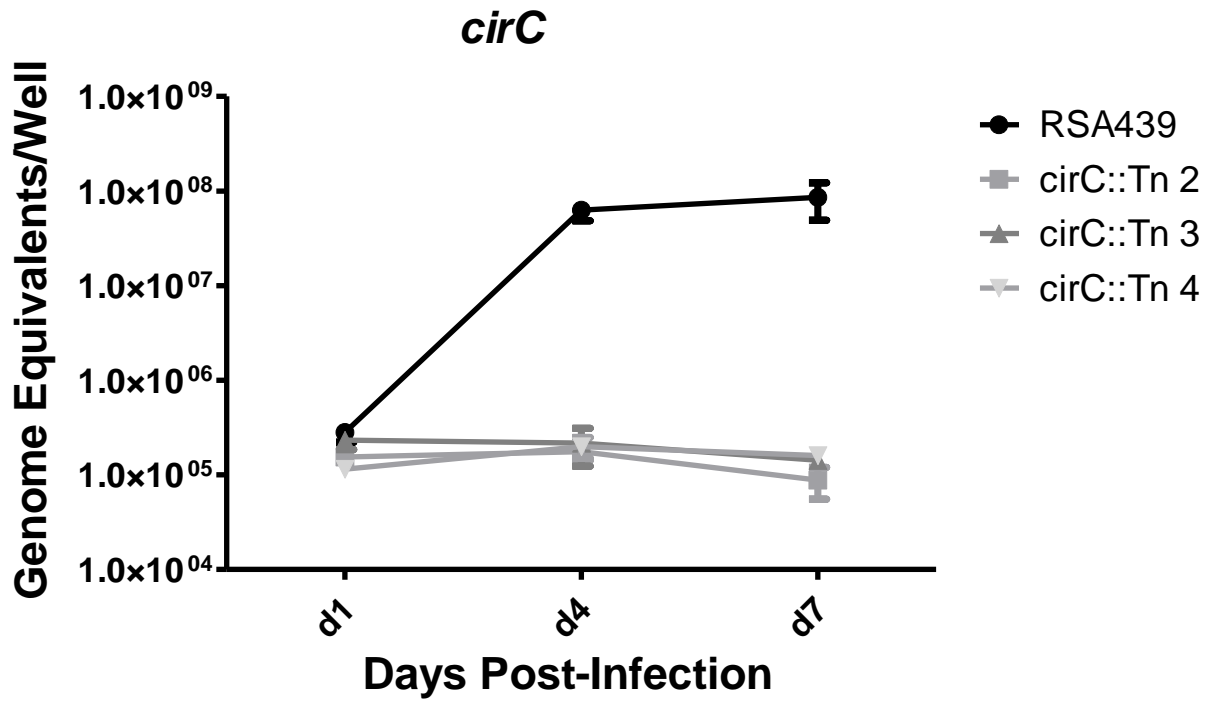

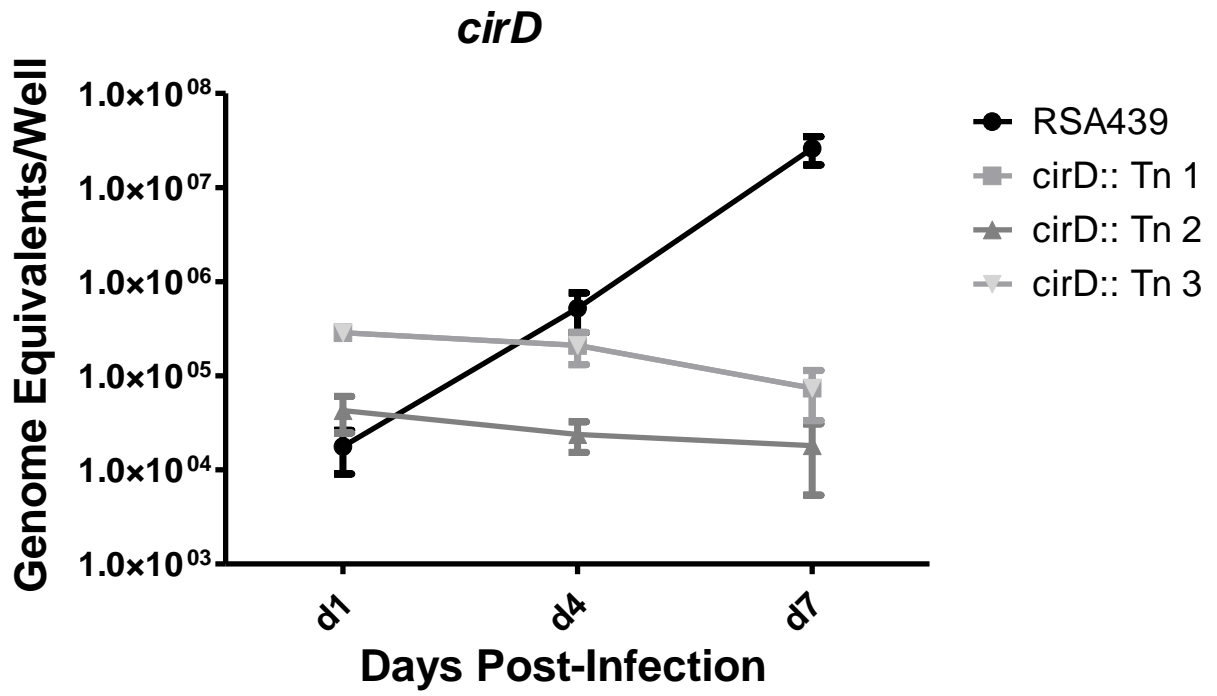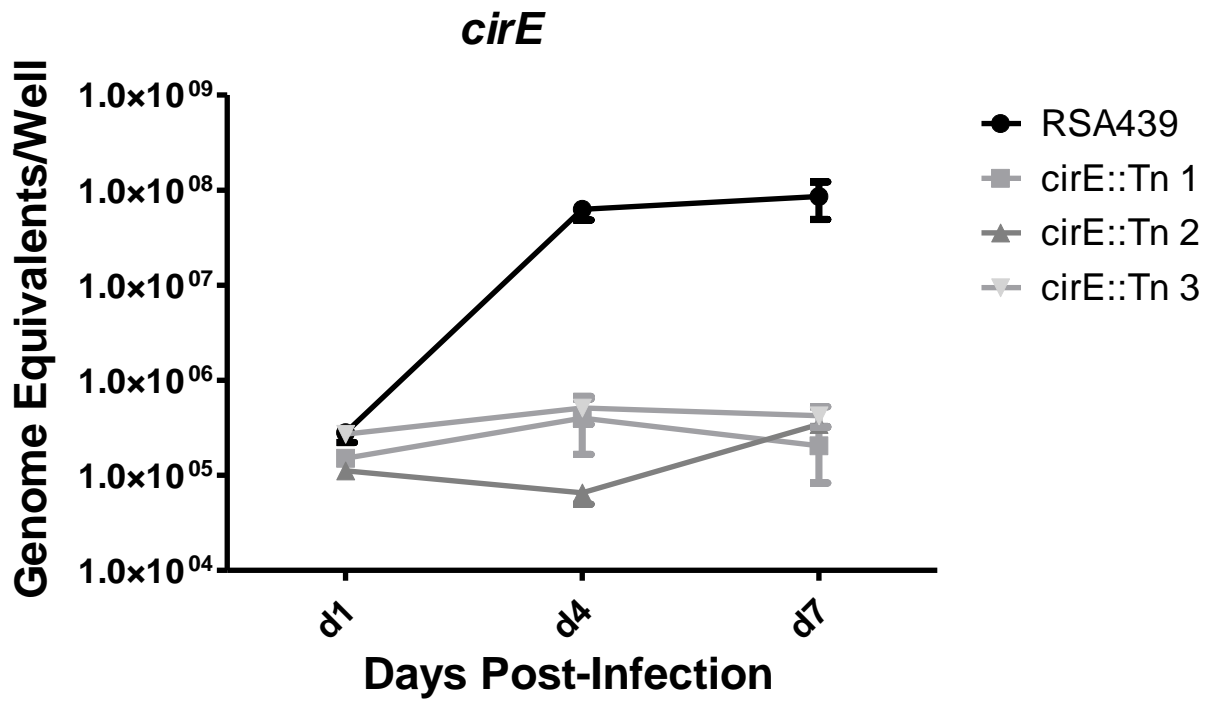

Figure S3: *C. burnetii* growth defects are due to the loss of individual effector proteins. (A) *C. burnetii* T4SS substrate mutants were used to inoculate ACCM-2 using  $1.0 \times 10^6$  bacteria/ml. Loss of individual effectors had no effect on axenic culture. (B) To verify that the growth defect is due to loss of individual effector proteins, three additional mutants obtained from separate transformations were used to infect J774A.1 cells at an MOI of 100. Genome equivalents were calculated at d1, d4, and d7. Each isolated Tn mutant exhibited a similar phenotype, indicating the inability to replicate intracellularly is due to the loss of a specific individual effector and is not likely attributable to another mutation at a secondary site.
